# Supplementary material
Source: PubMed Central journal article supplement (PMC4592315)
Supplement: supp_150234_150234-res-2-at.pdf [file supp_150234_150234-res-2-at.pdf]

**Appendix 2 (as supplied by the authors): Determination of household food security status, based on responses to 18-item Household Food Security Survey Module**

| <b>Status</b>            | <b>Interpretation</b>                                                                                             | <b>10 item adult food security scale</b>     | <b>8 item child food security scale</b> |
|--------------------------|-------------------------------------------------------------------------------------------------------------------|----------------------------------------------|-----------------------------------------|
| Food secure              | No report of income-related problems of food access.                                                              | No items affirmed                            | No items affirmed                       |
| Marginal food insecurity | Some indication of worry or an income-related barrier to adequate, secure food access.                            | Affirmed no more than 1 item on either scale |                                         |
| Moderate food insecurity | Compromise in quality and/or quantity of food consumed by adults and/or children due to a lack of money for food. | 2 to 5 positive responses                    | 2 to 4 positive responses               |
| Severe food insecurity   | Disrupted eating patterns and reduced food intake among adults and/or children.                                   | 6 or more positive responses                 | 5 or more positive responses            |
